# Supplementary material for: Thermodynamic Study of Solar Assisted Hybrid Cooling Systems With Consideration of Duration in Heat-Driven Processes
Source: Preprints.org preprint supplement (doi:10.20944/preprints202204.0229.v1), 2022-04-26
Supplement: Supplementary file 2 [file supplementary]

**Highlights**

- Effect of duration in heat-driven processes on system performance is studied
- Optimum parameters for different indicators are same
- Optimal inter-stage pressure is sensitive to conditions for two-stage cycle
- Optimal inter-stage temperature varies less for layout with cascade condenser
- Performance of layout with cascade subcooler is fixed on intermediate temperature
